# Supplementary material
Source: ML conference proceedings conference paper supplement (https://proceedings.neurips.cc/paper_files/paper/2010/hash/8df707a948fac1b4a0f97aa554886ec8-Abstract.html)
Supplement: Supplementary file 2 [file 8df707a948fac1b4a0f97aa554886ec8-Supplemental.zip]

Archive with 1 entries (1 files):
- extra/NIPS2010_0715_extra.pdf
